# Supplementary material for: A scaffold with a bio-mimetically designed micro/nano-fibrous structure using decellularized extracellular matrix
Source: Royal Society of Chemistry journal article supplement (doi:10.1039/c5ra27845g), 2016-01-01
Supplement: c5ra27845g1.pdf [file c5ra27845g1.pdf]

## Supplementary Materials

A scaffold with a bio-mimetically designed micro/nanofibrous structure using decellularized extracellular matrix

Hyeongjin Lee,<sup>1</sup> Sira Yang,<sup>1</sup> Minseong Kim, and GeunHyung Kim\*

Department of Biomechatronic Engineering, College of Biotechnology and Bioengineering,  
Sungkyunkwan University, Suwon 440-746, Republic of Korea

<sup>1</sup> These authors contributed equally to this study.

### \*Corresponding Author

Prof. GeunHyung Kim

Tel.: +82-31-290-7828

Fax: +82-31-290-7870

E-mail address: gkimbme@skku.edu

Postal address: Department of Biomechatronic Engineering, College of Biotechnology and  
Bioengineering, Sungkyunkwan University, Suwon 440-746, Republic of Korea

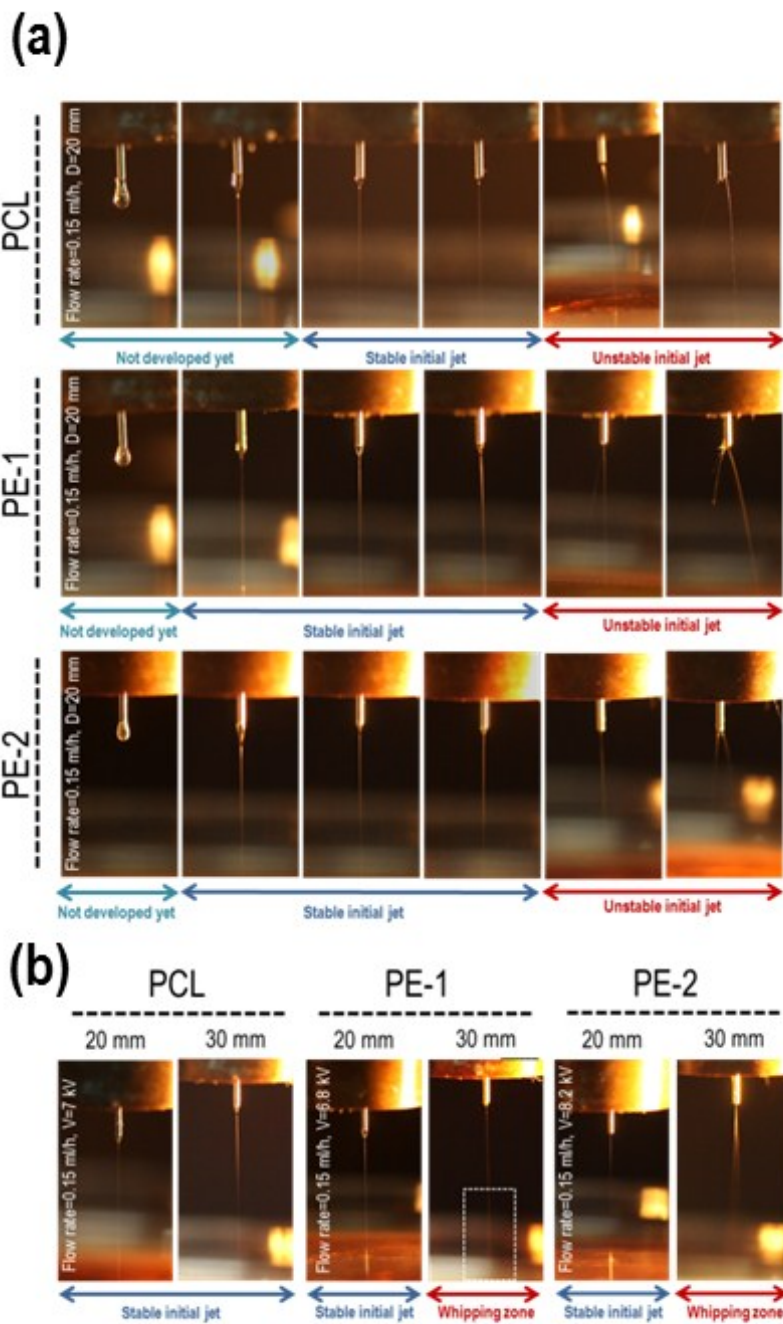

**Figure S1.** Optical images of initial jets applied with (a) various electric field strengths (4, 5, 7, 8, 9, and 10 kV) under a fixed flow rate (0.15 mL/h) and distance (20 mm) between the nozzle tip and ethanol surface, and (b) two different distances (20 and 30 mm) under a fixed electric field strength (7 kV) and flow rate (0.15 mL/h).

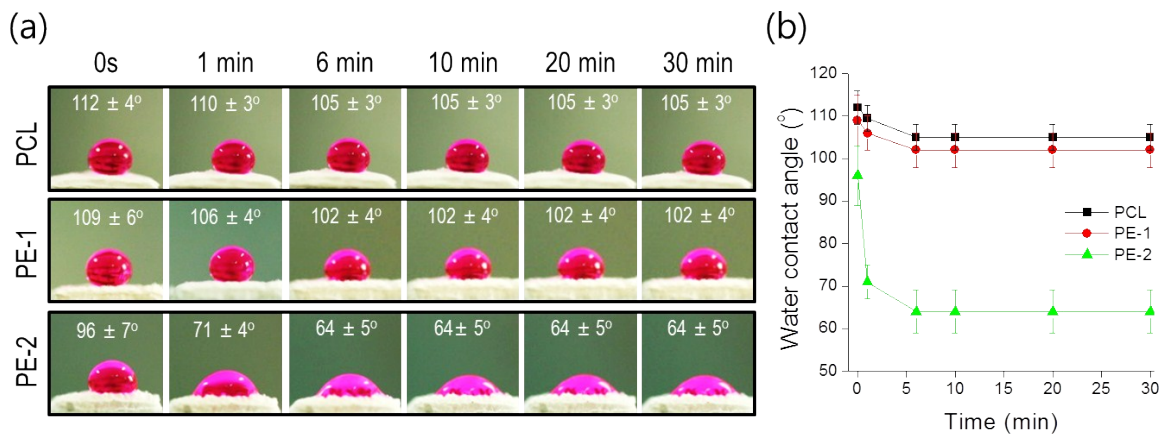

**Figure S2.** (a) Transient contact-angle images of one droplet (10  $\mu$ L) of water mixed with red dye for PCL, PE-1, and PE-2. (b) The graph on the right is a comparison of water contact angle.
